# Supplementary material
Source: PubMed Central journal article supplement (PMC11305428)
Supplement: NIHMS856336-supplement-Appendix_A__Supplementary_data.pdf [file NIHMS856336-supplement-Appendix_A__Supplementary_data.pdf]

## Supplementary Information

### 1. Support vector machine

The support vector machines are supervised learning models to classify data represented by vectors in multi-dimensional spaces with boundaries defined by associated algorithms. In detail, the training set of the classification problem is in the form:  $\{\mathbf{x}_i, y_i\}, i = 1, 2, \dots, n$ , where  $\mathbf{x}_i \in \mathfrak{R}^d$  are vectors representing the data, and  $y_i \in \{+1, -1\}$  are class labels for two classes.

In this study, we used support vector machines with linear kernel, with which the classifier boundaries are hyperplanes in the form  $\mathbf{w} \cdot \mathbf{x} + b = 0$  where  $\mathbf{w}$  is the normal vector of the hyperplane and  $b$  is the term determining offset. For separable cases the decision function for classification is then defined as  $f(\mathbf{x}) = \mathbf{w} \cdot \mathbf{x} + b$  so that  $f(\mathbf{x}_i) \geq 1$  if  $y_i = 1$  or  $f(\mathbf{x}_i) \leq -1$  if

$y_i = -1$ . Thus the margin between two classes is  $\frac{2}{\|\mathbf{w}\|}$ . SVMs optimize the classification by maximizing the margin and the problem can be formulated as:

$$\arg \min_{(\mathbf{w}, b)} \left( \frac{1}{2} \|\mathbf{w}\|^2 \right) \quad (\text{S1})$$

subject to  $y_i(\mathbf{w} \cdot \mathbf{x} + b) \geq 1$ , (for any  $i = 1, 2, \dots, n$ )

For non-separable cases, compromise of the decision functions and mislabeling are allowed, which are described by the “slack variables”:  $\xi_i \geq 0, i = 1, 2, \dots, n$ . Thus SVMs optimize the classification by both maximization of the margin and minimization of the penalty caused by the slack variables. The problem is formulated as:

$$\arg \min_{(\mathbf{w}, b, \xi)} \left( \frac{1}{2} \|\mathbf{w}\|^2 + C \sum_{i=1}^n \xi_i \right) \quad (\text{S2})$$

subject to  $y_i(\mathbf{w} \cdot \mathbf{x} + b) \geq 1 - \xi_i, \xi_i \geq 0$

Introducing Lagrange multipliers, we can solve the problem by optimizing the Lagrangian:

$$\arg \min_{(\mathbf{w}, b, \xi)} \max_{(\alpha, \beta)} \frac{1}{2} \|\mathbf{w}\|^2 + C \sum_{i=1}^n \xi_i - \sum_{i=1}^n \alpha_i [y_i(\mathbf{w} \cdot \mathbf{x} + b) - 1 + \xi_i] - \sum_{i=1}^n \beta_i \xi_i \quad (\text{S3})$$

Therefore the normal vector of the hyperplane is  $\mathbf{w} = \sum_{i=1}^n \alpha_i y_i \mathbf{x}_i$ . For data points correctly classified and out of the margin,  $\alpha_i = 0, \xi_i = 0$ . For data points on the margin boundary,  $0 < \alpha_i < C, \xi_i = 0$  and  $f(\mathbf{x}_i) = \pm 1$ . For data points within the margin or misclassified,  $\alpha_i = C, \xi_i > 0$ . Any  $\mathbf{x}_i$  with  $\alpha_i > 0$  are named support vectors which contribute to define the normal vector of the classifier hyperplane. Therefore, support vectors are those data points on the margin boundary or with compromised decision function, suggesting they are not well classified by the trained classifier.

## 2. Selection of “median cells”

The “median cells” are single cells that we selected to represent the population morphological difference of two classes in each pairwise SVM comparison. Subsequent to each loop of the SVM training on supercells at supercell size of 5 with the selected features, the trained classifier was employed to classify the original single cells. Single cells with decision functions higher than 1 or lower than -1 were recorded as well classified single cells respectively for two classes. We then selected those single cells which are always well classified by the classifier of each training loop.

In the next step, for each class we calculated the total Euclidean distance from each selected single cell to all the other selected single cells in metric space established with only the selected features. The list of the selected single cells of each class was then sorted according to the total Euclidean distances. We then extracted the binary segmentations of those single cells with the lowest total Euclidean distances to represent the morphology of each class in Fig. 5.

## Supplementary Table 1

Explanations of some shape metrics of the total 22 shape metrics

| Metric Category | Metrics                     | Explanations                                                                                                                                                                                                                                                                                                                                                                                                                                                                                                                                                                                                           |
|-----------------|-----------------------------|------------------------------------------------------------------------------------------------------------------------------------------------------------------------------------------------------------------------------------------------------------------------------------------------------------------------------------------------------------------------------------------------------------------------------------------------------------------------------------------------------------------------------------------------------------------------------------------------------------------------|
| Cell Size       | 1. Area                     | Area of the 2-D projection of the cell                                                                                                                                                                                                                                                                                                                                                                                                                                                                                                                                                                                 |
|                 | 2. Perimeter                | Perimeter of the 2-D projection of the cell                                                                                                                                                                                                                                                                                                                                                                                                                                                                                                                                                                            |
|                 | 3. Mean Boundary Distance   | Average distance from the geometrical center of the cell outline to each representative point on the cell boundary                                                                                                                                                                                                                                                                                                                                                                                                                                                                                                     |
|                 | 4. Max Boundary Distance    | Maximum distance from the geometrical center of the cell outline to each representative point on the cell boundary                                                                                                                                                                                                                                                                                                                                                                                                                                                                                                     |
|                 | 5. Major Axis Length        | Length of the major axis of the ellipse that has the same normalized second central moments as the 2-D projection of the cell                                                                                                                                                                                                                                                                                                                                                                                                                                                                                          |
|                 | 6. Minor Axis Length        | Length of the minor axis of the ellipse that has the same normalized second central moments as the 2-D projection of the cell                                                                                                                                                                                                                                                                                                                                                                                                                                                                                          |
|                 | 7. Max Major Branch Length  | For each major branch, assuming the branch origin is the intersection point of the cell equivalent circle and the extracted branch skeleton. The farthest distance from the intersection point of the cell equivalent circle and the extracted branch skeleton to the major branch boundary points is taken as the length of the major branch. PCA analysis is applied to boundary points of the major branch (the part out of the equivalent circle). Width of each branch is defined as the average of double of the projection of the branch boundary points to the direction of the secondary principal component. |
|                 | 8. Mean Major Branch Length |                                                                                                                                                                                                                                                                                                                                                                                                                                                                                                                                                                                                                        |
|                 | 9. Max Major Branch Width   |                                                                                                                                                                                                                                                                                                                                                                                                                                                                                                                                                                                                                        |
|                 | 10. Mean Major Branch Width |                                                                                                                                                                                                                                                                                                                                                                                                                                                                                                                                                                                                                        |
| Shape Pattern   | 11. Circularity             | Ratio of the perimeter of the cell to the perimeter of the cell equivalent circle. The equivalent circle is defined as the circle having the same area and geometrical center with the cell. Circularity is normalized so that circularity of a circle is 1                                                                                                                                                                                                                                                                                                                                                            |
|                 | 12. Solidity                | Area of the cell over the convex hull encompassing the cell. The convex hull of a shape is the shortest boundary that can be drawn around that shape with no negative curvature segments (i.e. invaginations). A smaller solidity therefore indicates more or larger invaginations.                                                                                                                                                                                                                                                                                                                                    |
|                 | 13. Aspect Ratio            | Ratio of major axis length over minor axis length of the ellipse that has the same normalized second central moments as the 2-D projection of the cell                                                                                                                                                                                                                                                                                                                                                                                                                                                                 |

|                             |                                                   |                                                                                                                                                                                                                                                                                         |
|-----------------------------|---------------------------------------------------|-----------------------------------------------------------------------------------------------------------------------------------------------------------------------------------------------------------------------------------------------------------------------------------------|
|                             | 14. Num. of Major Branches                        | In the skeleton structure of the cell, major branches are identified as the branches extending out the central part defined as the part of cell inside the equivalent circle (the circle which is centered at the geometrical centroid of the cell and has the same area with the cell) |
|                             | 15. Max Branch Length/ Major Axis Length          |                                                                                                                                                                                                                                                                                         |
|                             | 16. Mean Branch Length/ Equivalent Radius         | Equivalent radius is defined as the radius of the circle which is centered at the geometrical centroid of the cell and has the same area with the cell                                                                                                                                  |
| Local Curvature Information | 17. Mean Negative Curvature                       | The curvature at a certain point is defined as the reciprocal of the radius of the circular arc which fits that point and the two neighborhood points 2 points away from it. Mean negative curvature is the sum of negative curvatures over the perimeter of the cell outline           |
|                             | 18. Invagination                                  | Number of concave regions with continuous negative curvature on the boundary, normalized by the perimeter                                                                                                                                                                               |
|                             | 19. Tortuosity                                    | An integral of square of derivative of curvature, divided by the length of a curve                                                                                                                                                                                                      |
|                             | 20. Num. of Tiny Protrusions                      | Small protrusions are identified as humps of positive curvature on the cell boundary which contains at least 5 boundary points                                                                                                                                                          |
|                             | 21. Num. of Protrusions per Branch                | Average number of protrusions per branch in a cell                                                                                                                                                                                                                                      |
|                             | 22. Average Boundary Interval Between Protrusions | Perimeter over the number of the protrusions                                                                                                                                                                                                                                            |

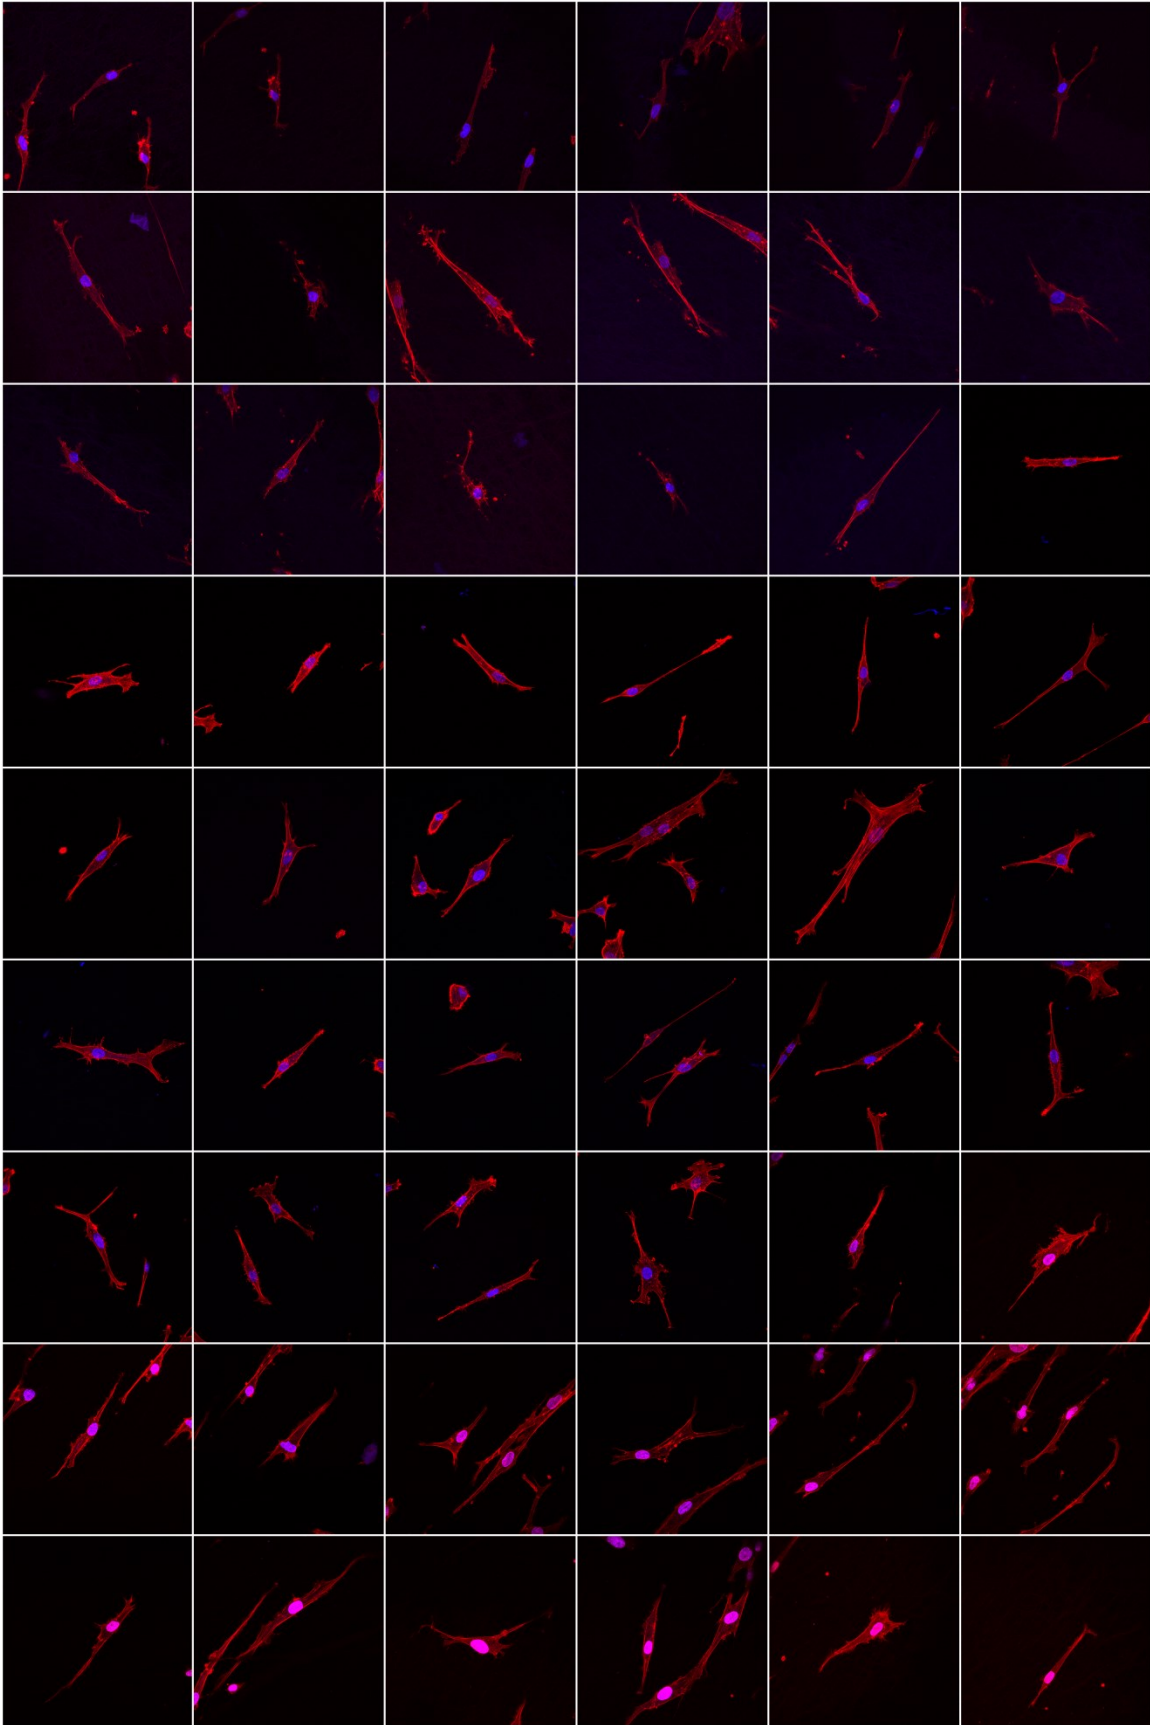

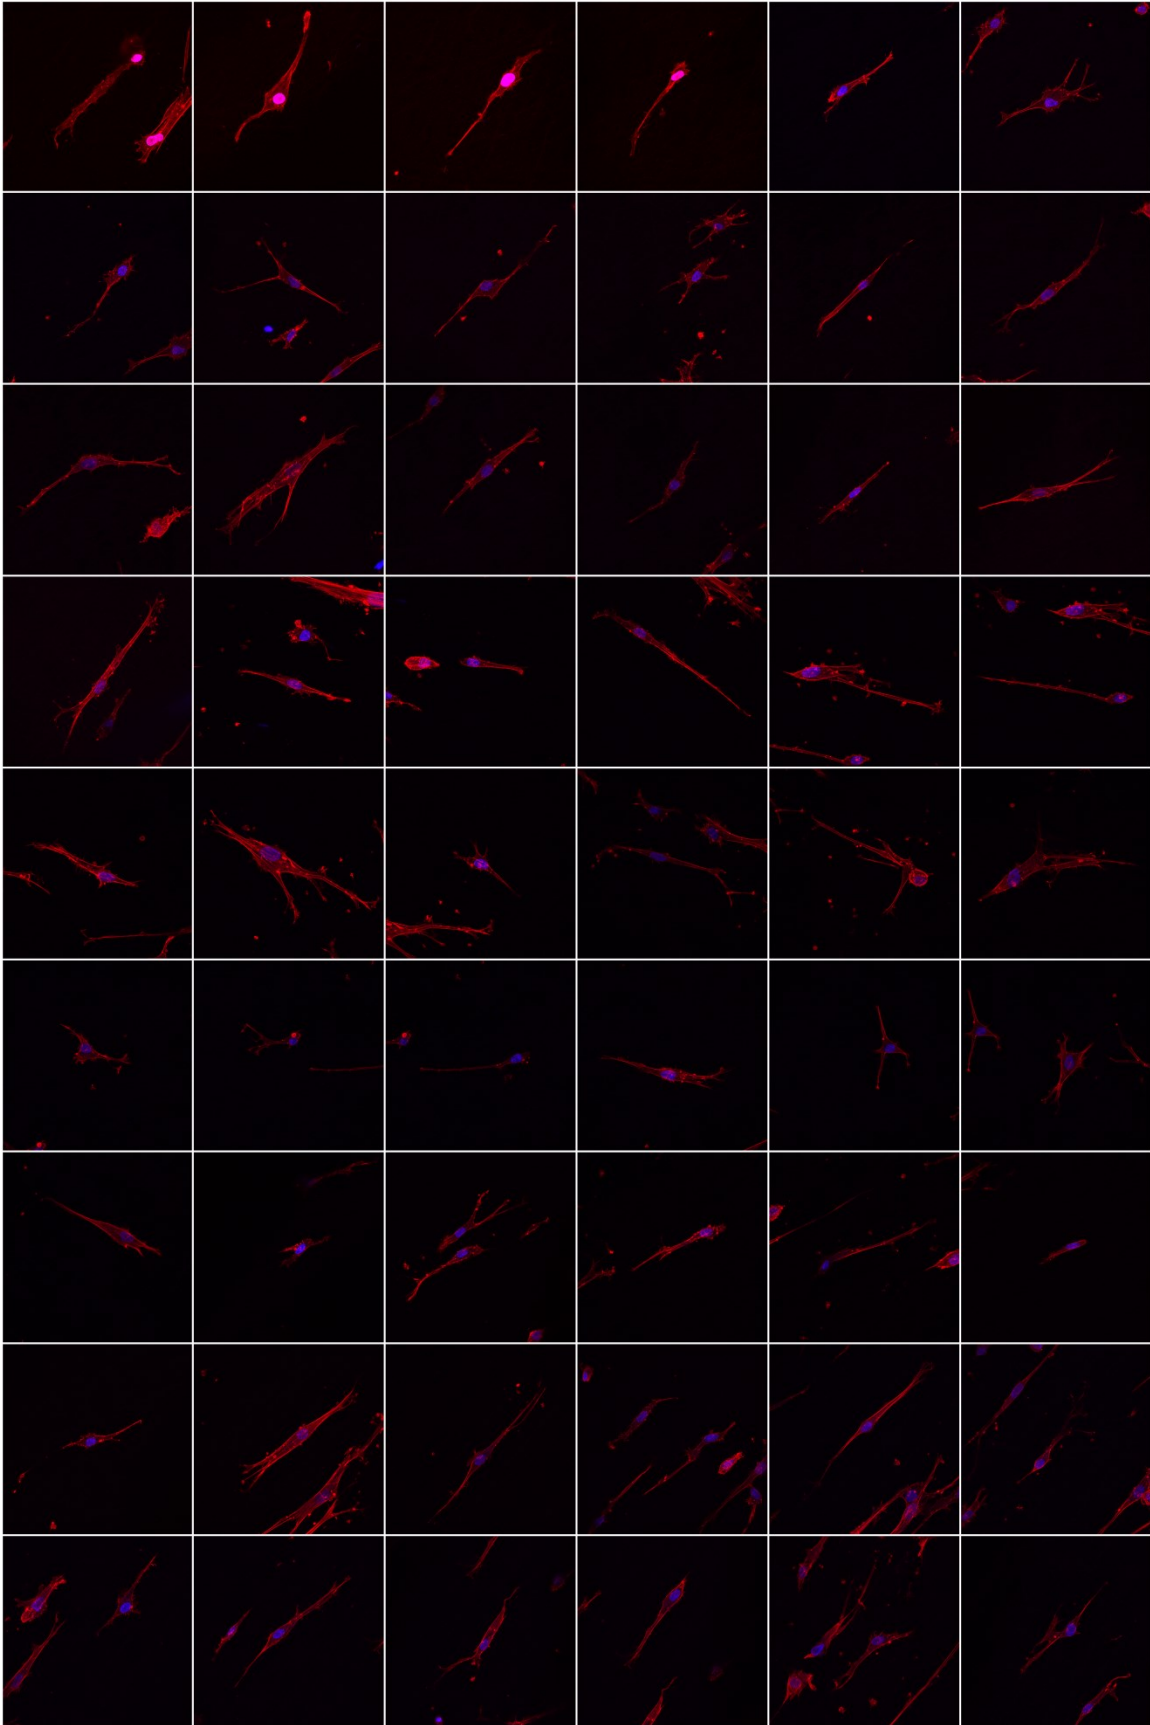

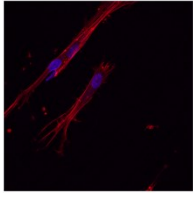

Maximum intensity projections of 3-D z-stack images in xy plane of hBMSCs of FS

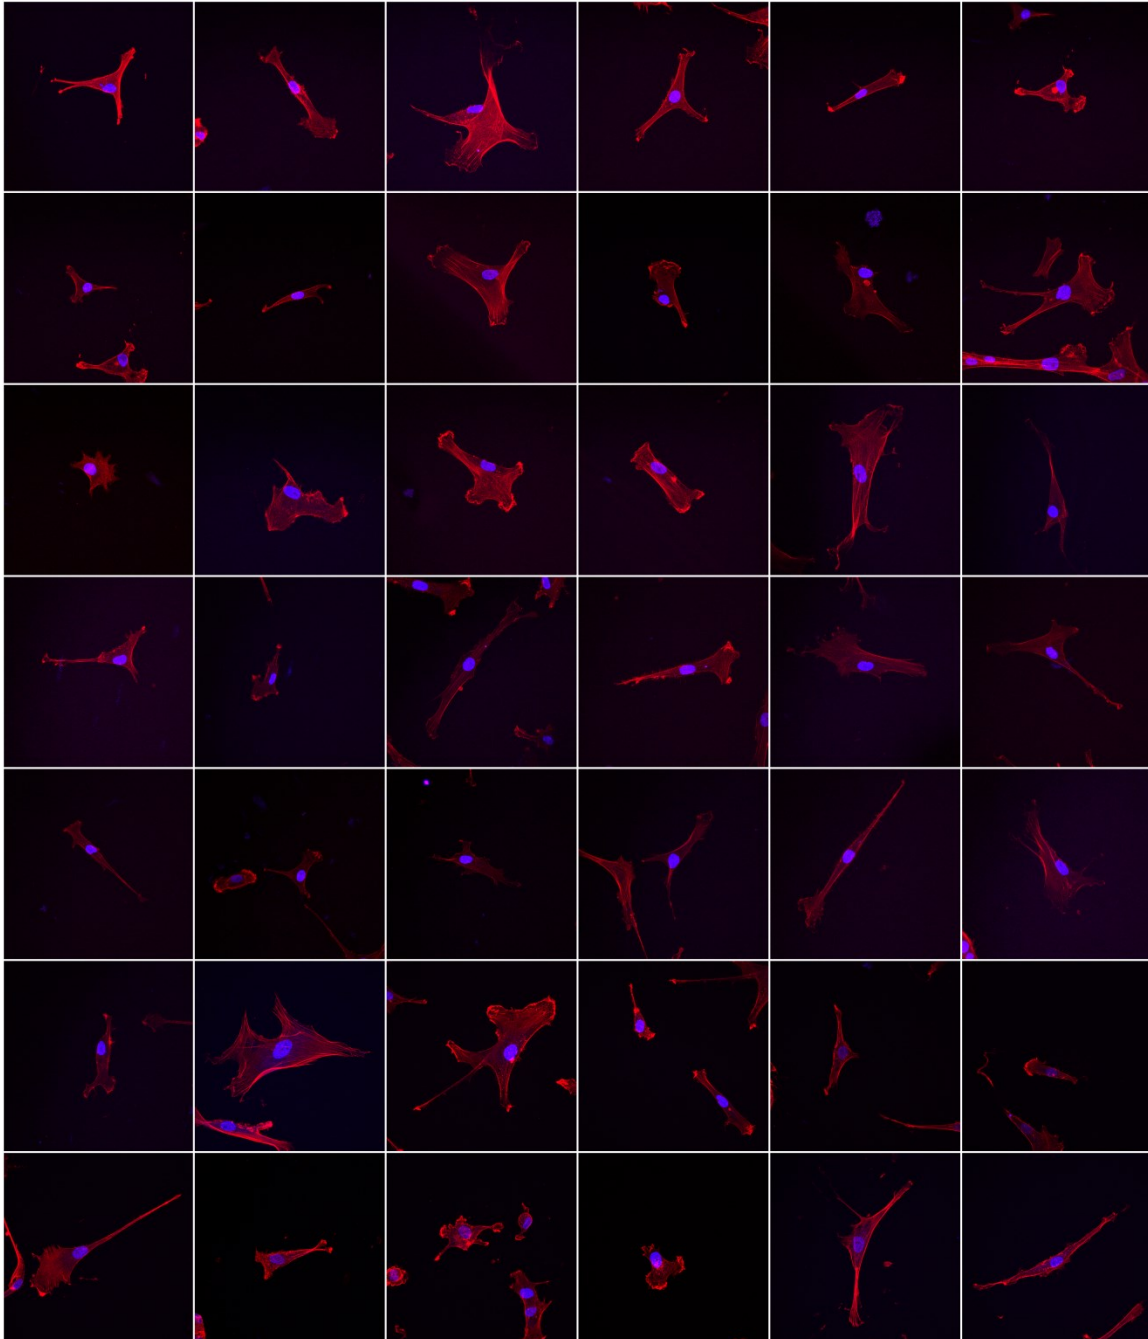



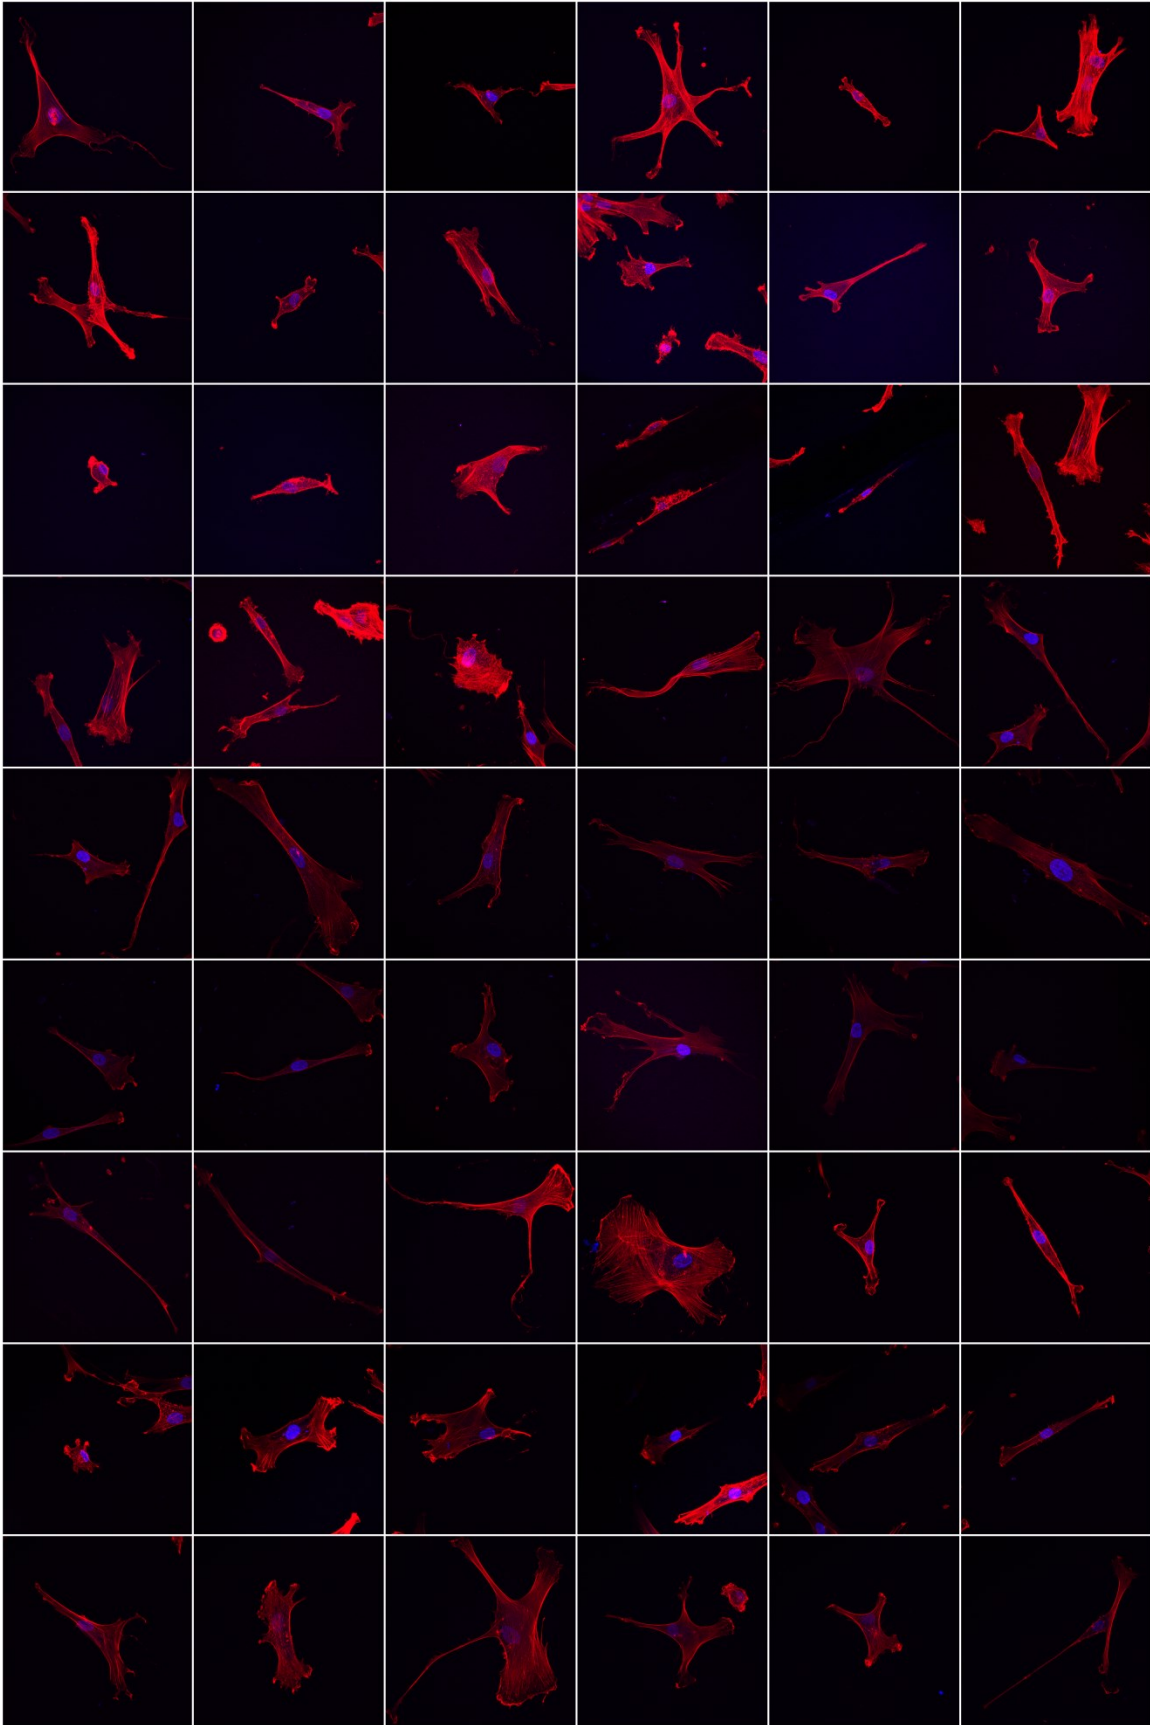



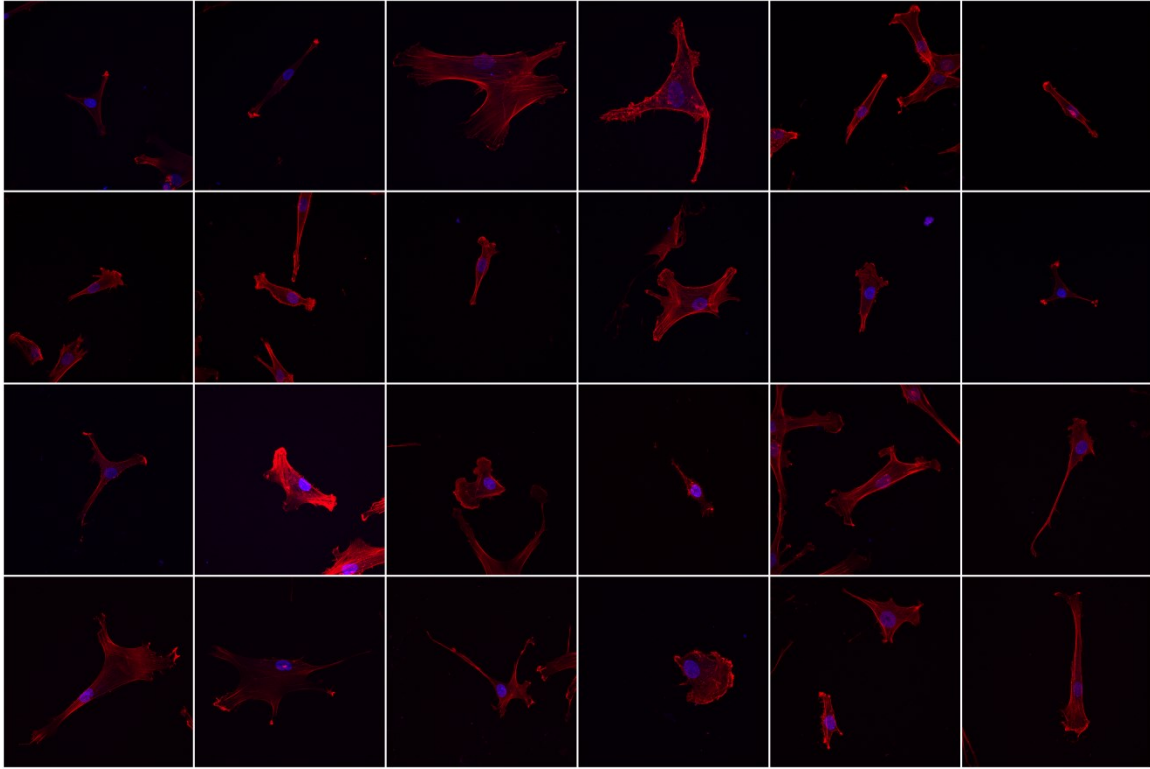

Maximum intensity projections of 3-D z-stack images in xy plane of hBMSCs of SC

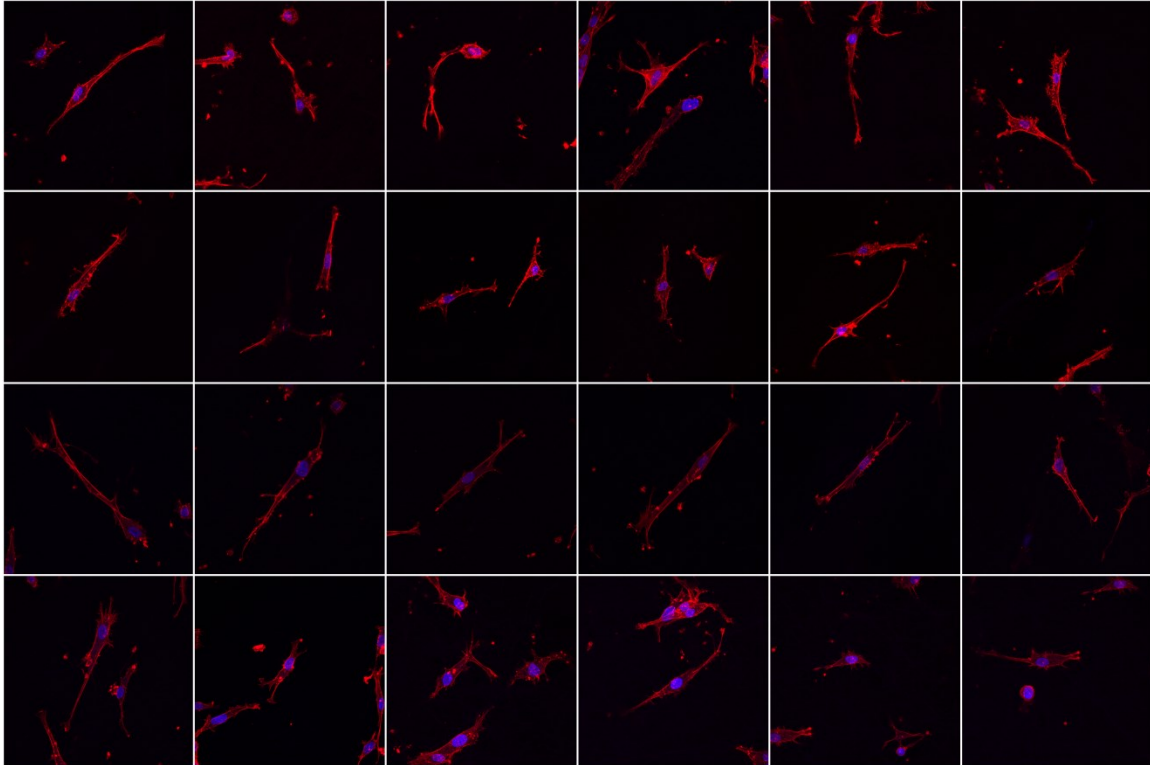

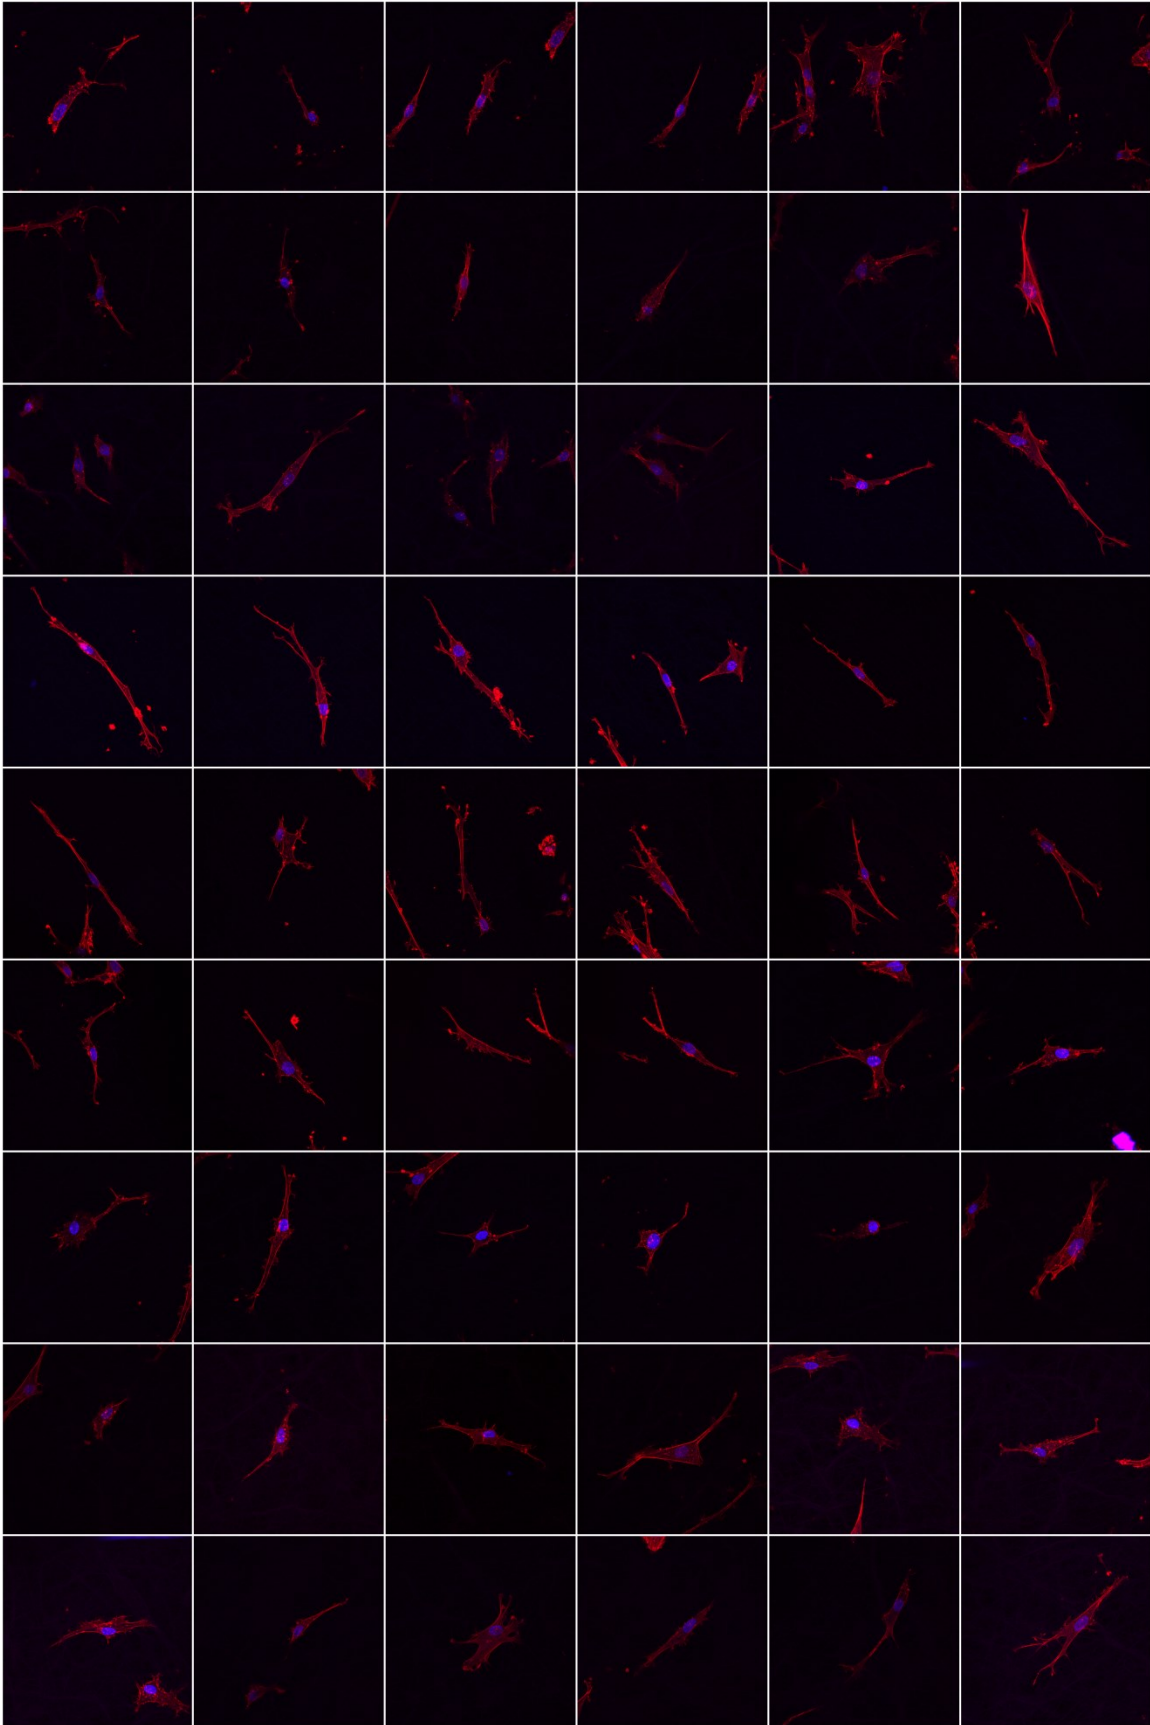

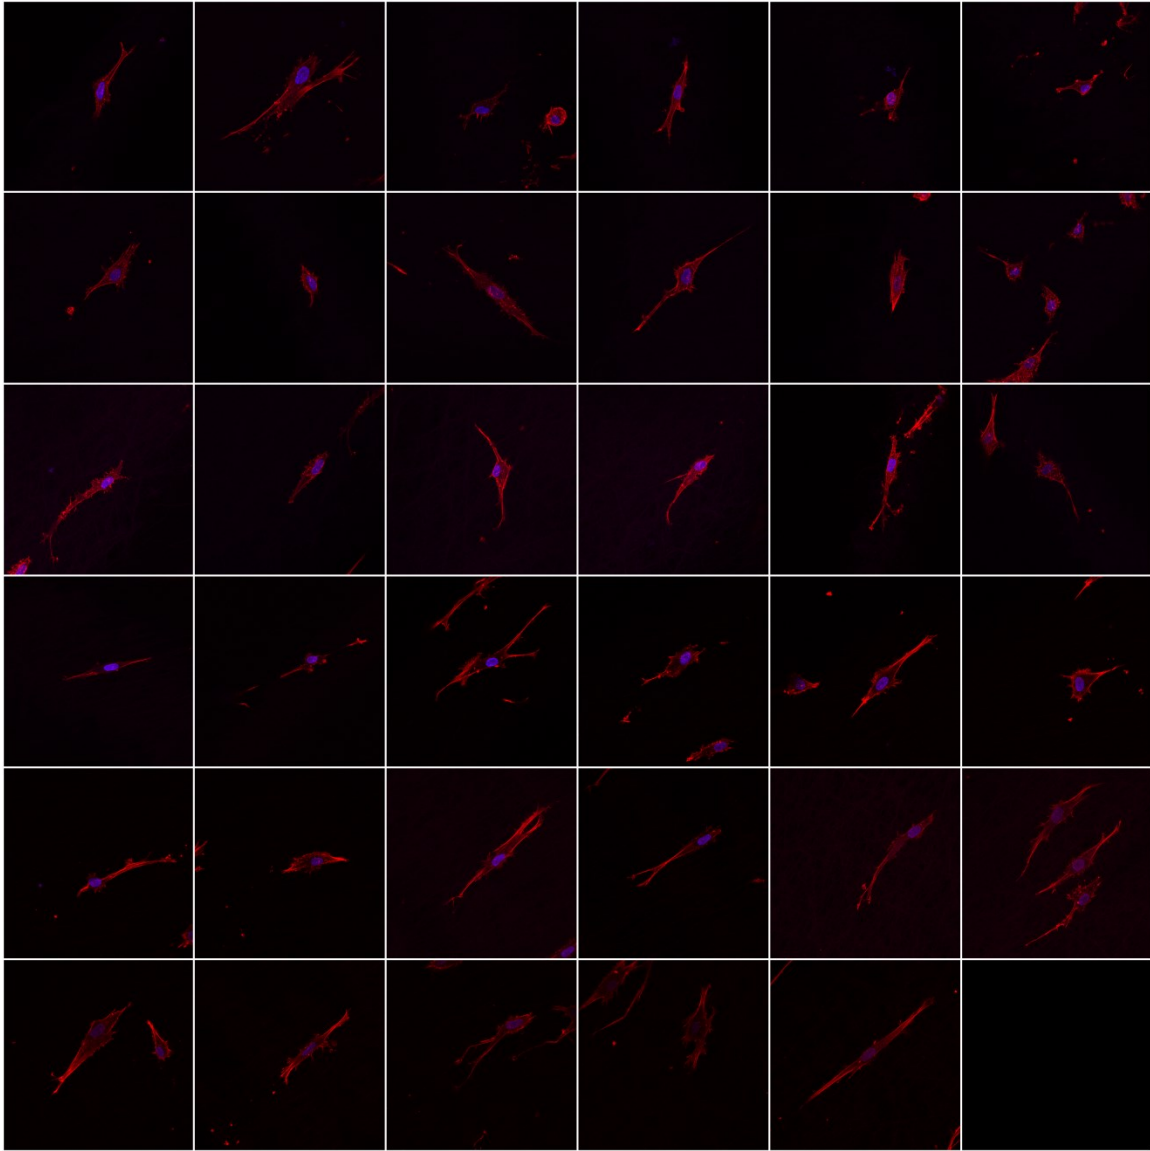

Maximum intensity projections of 3-D z-stack images in xy plane of hBMSCs of FS+OS

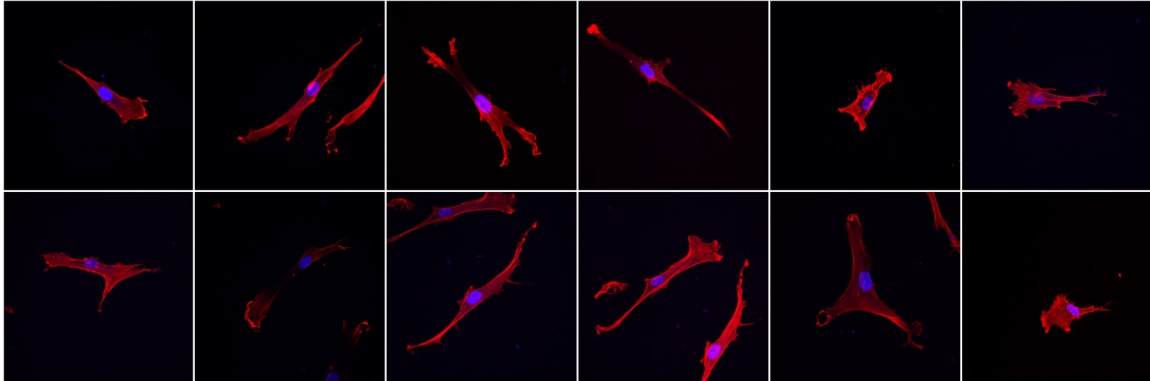

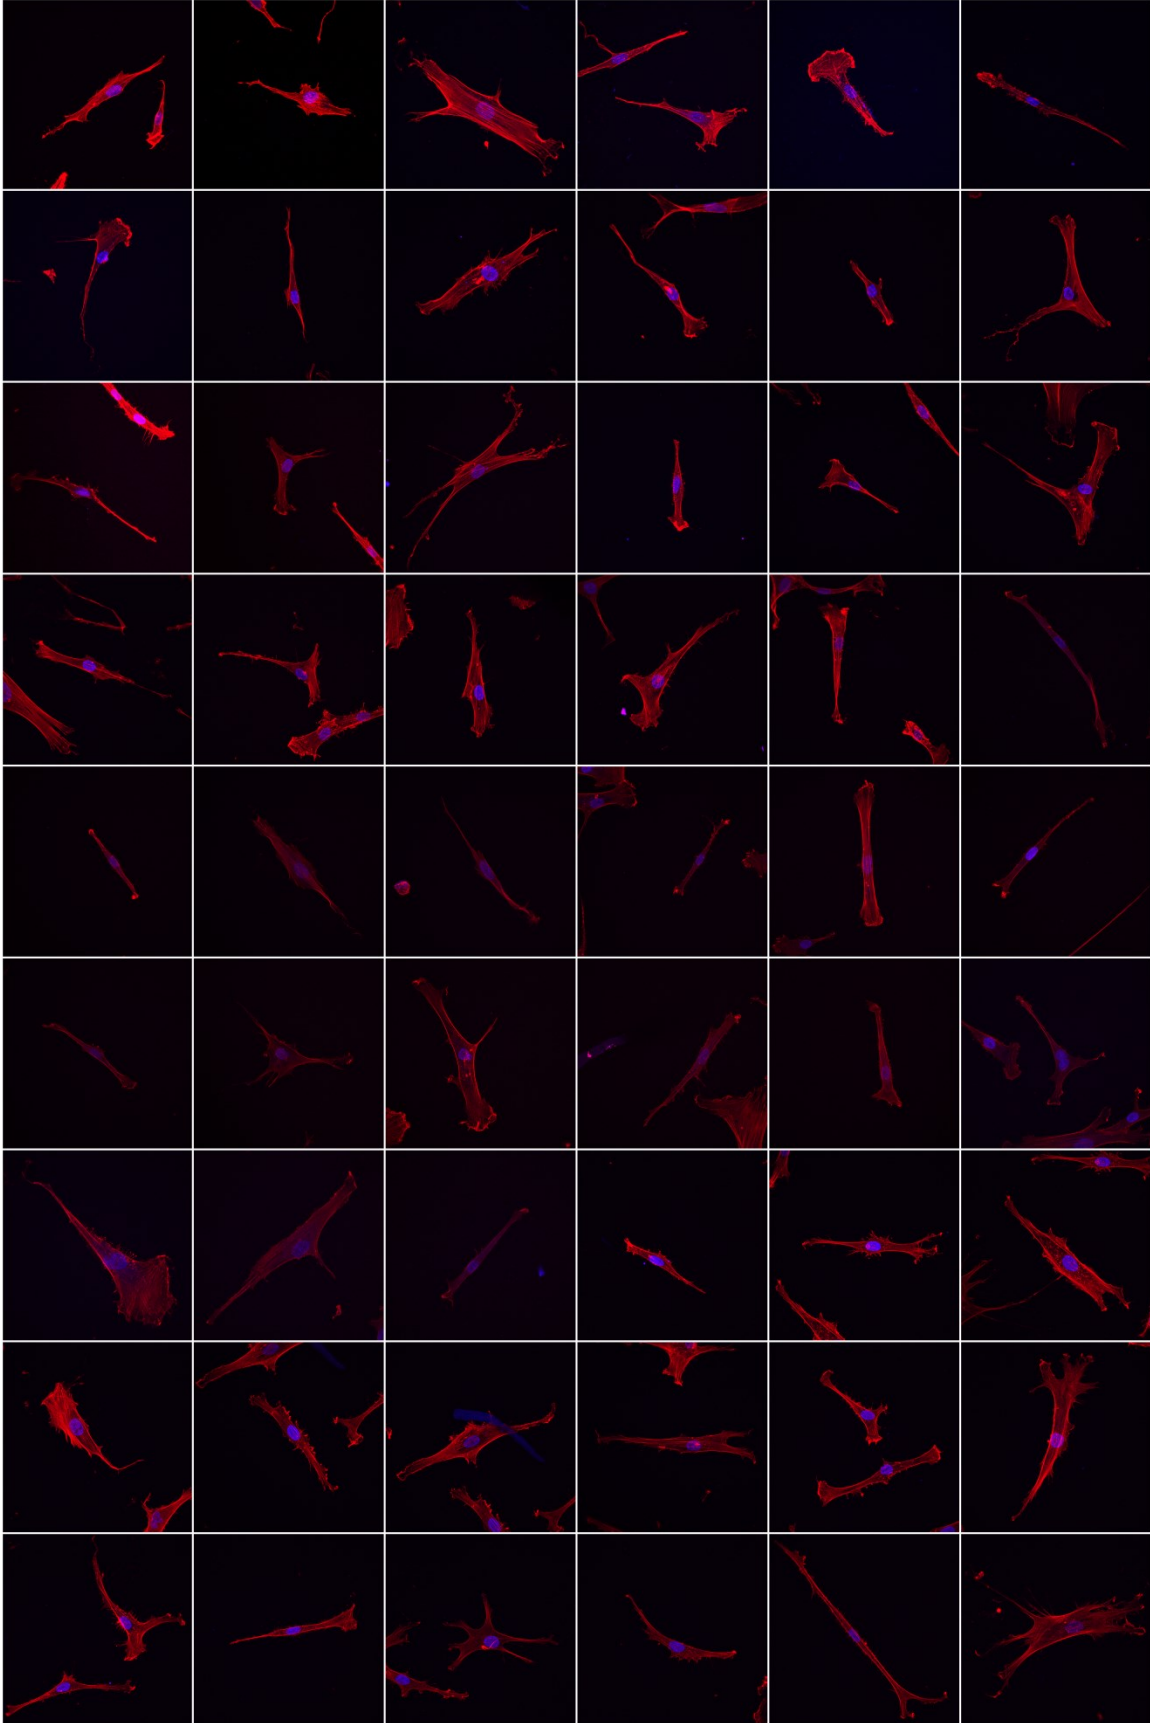



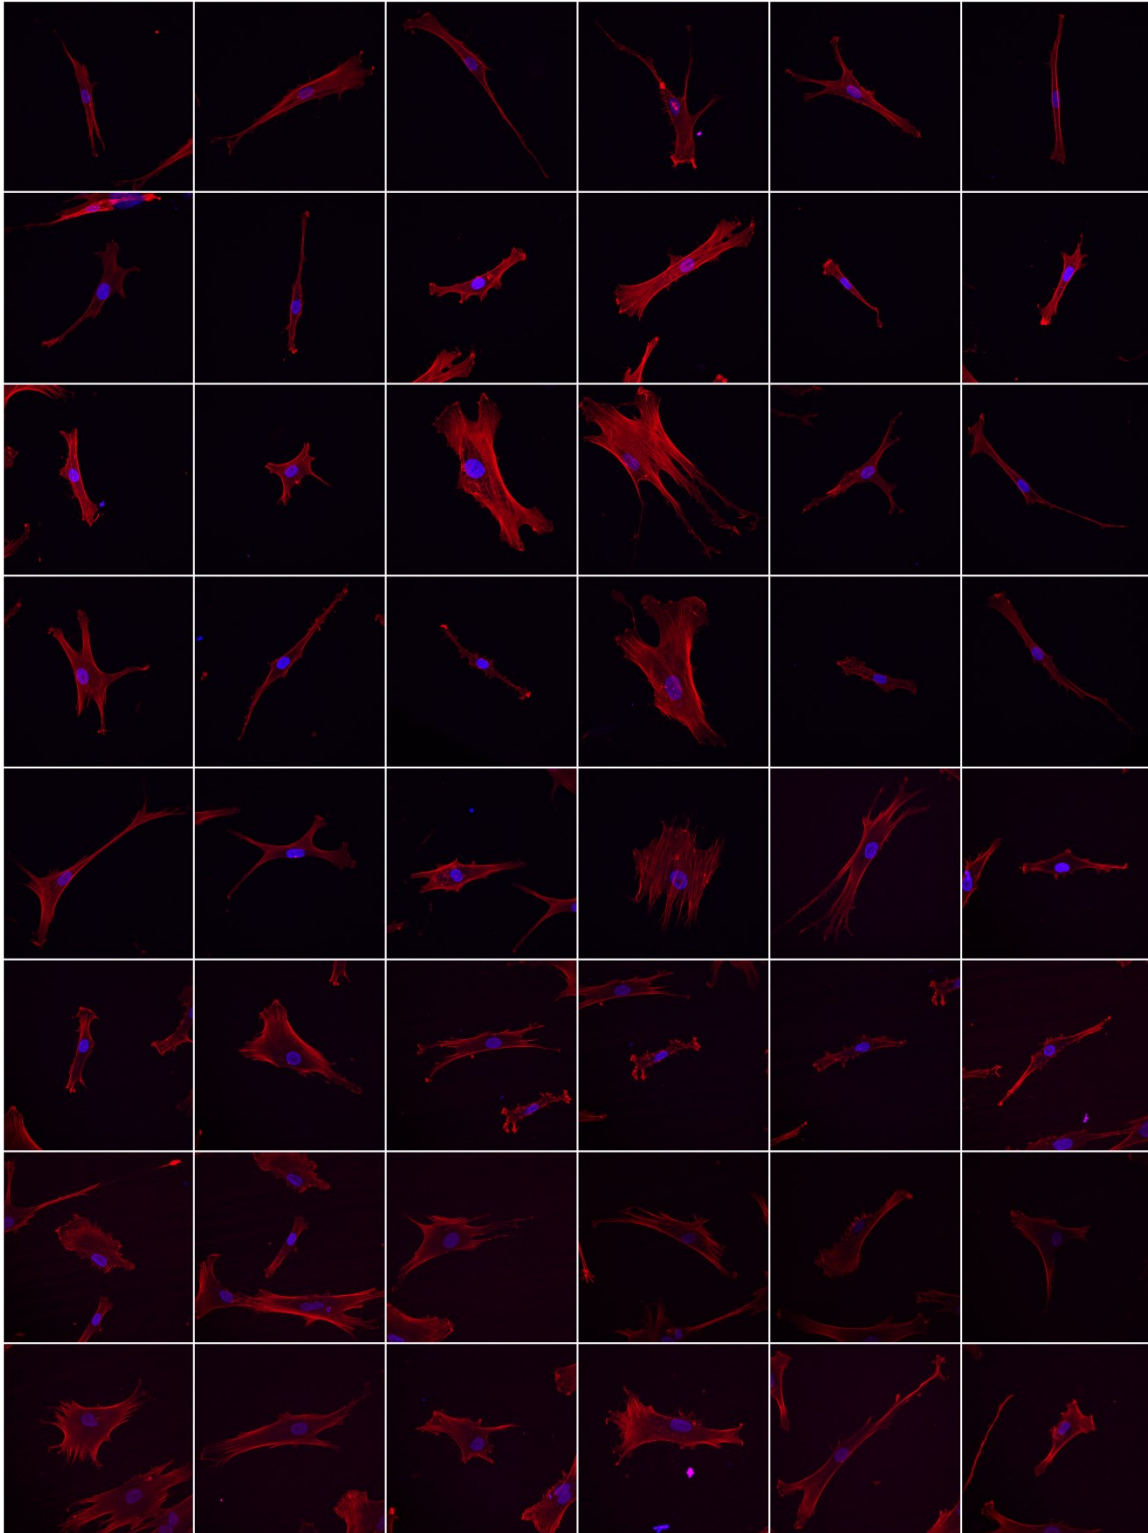

Maximum intensity projections of 3-D z-stack images in xy plane of hBMSCs of SC+OS

**Supplementary Fig 1.** Maximum intensity projections of 3-D z-stack images of actin (red) and nucleus (blue).

a

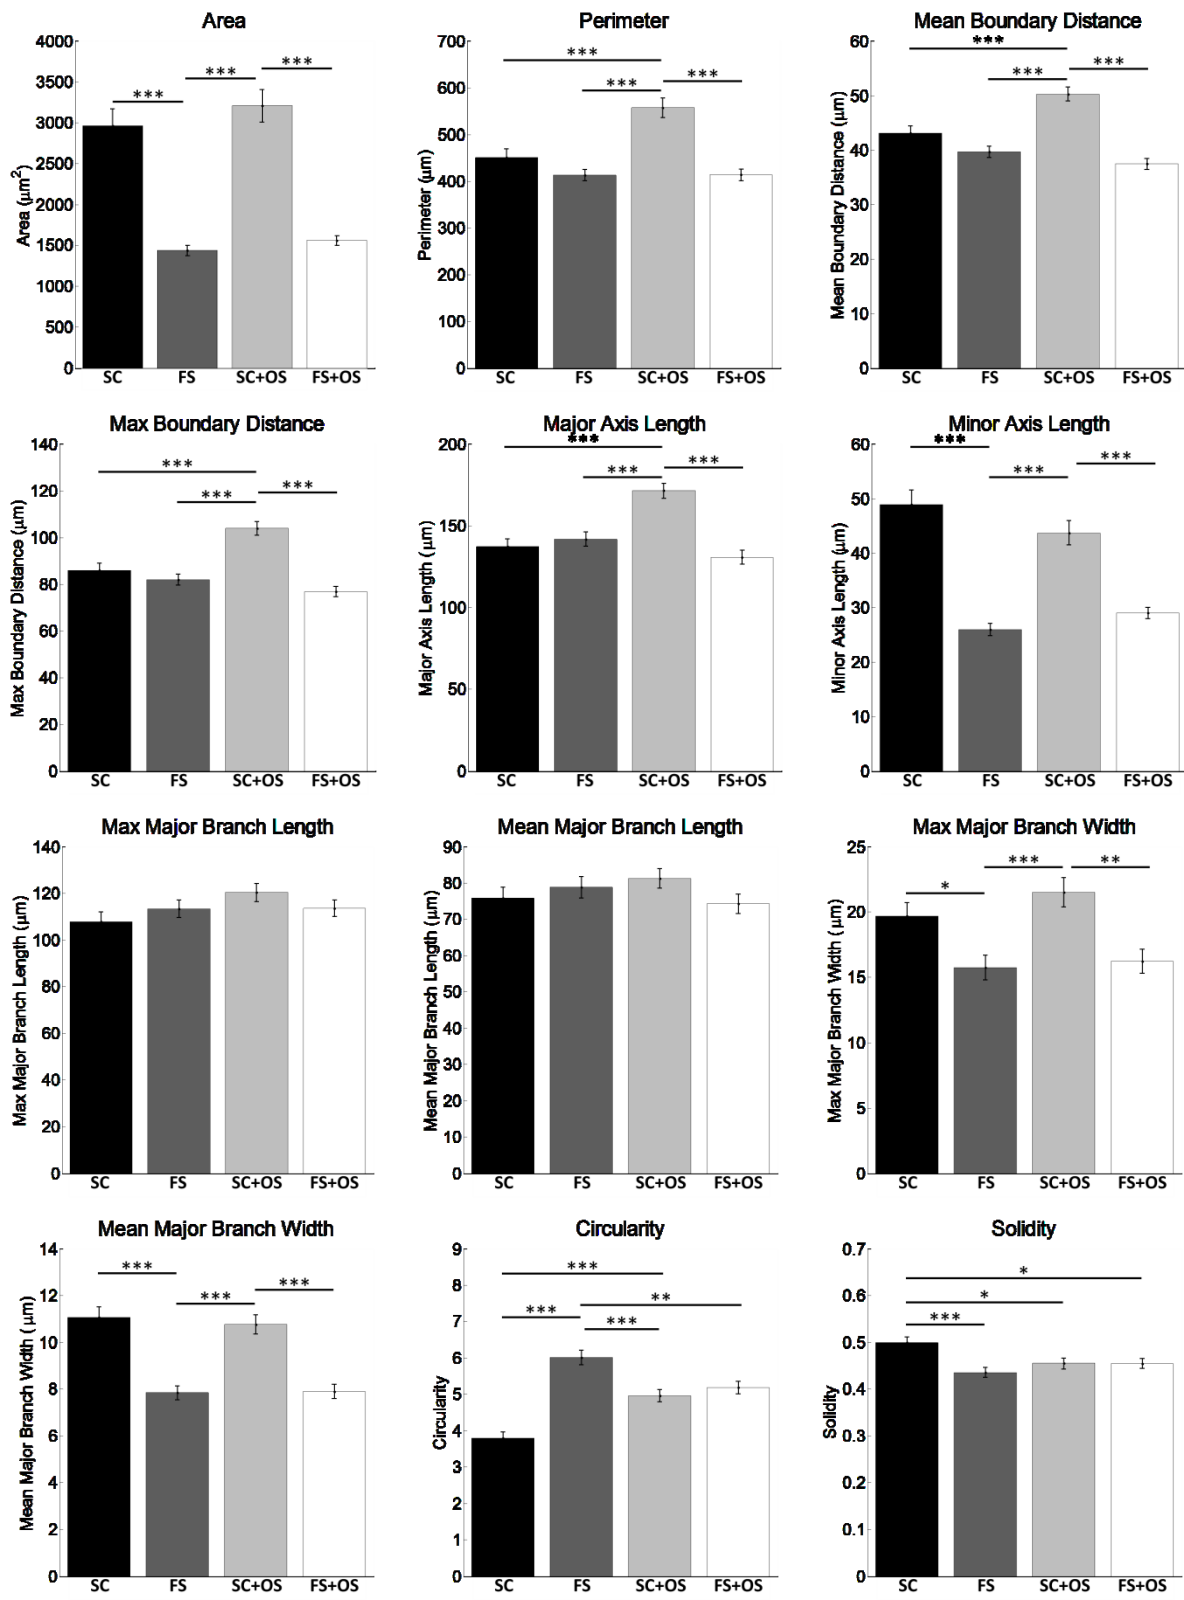

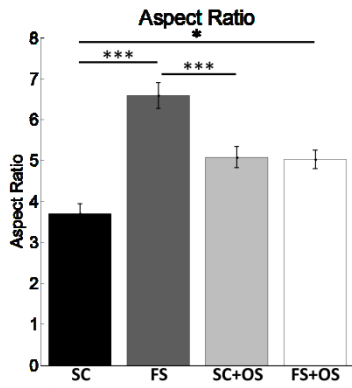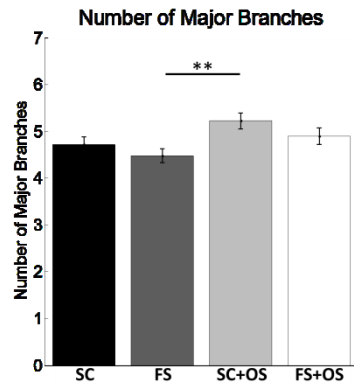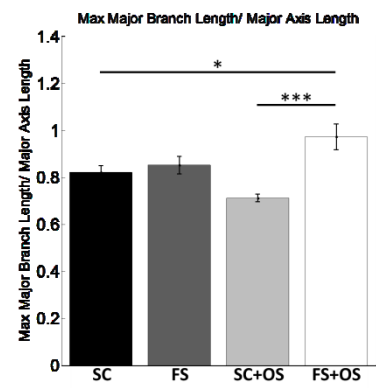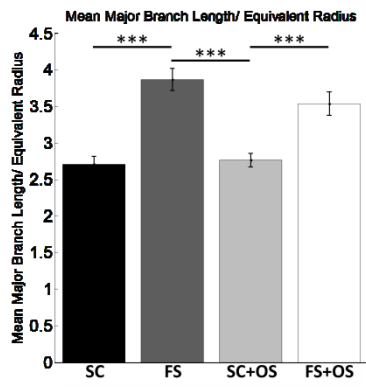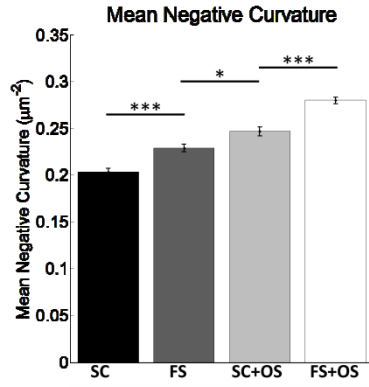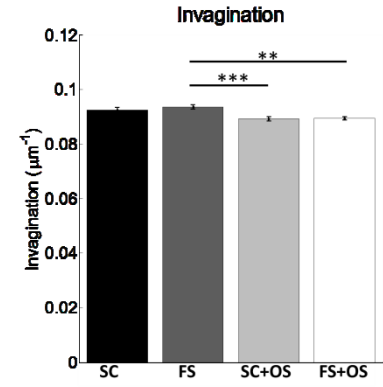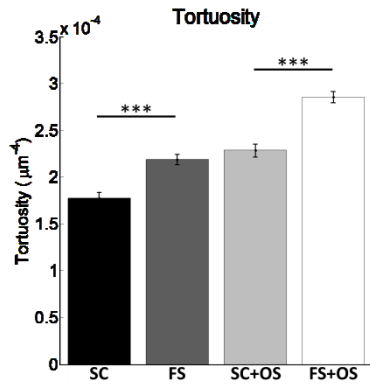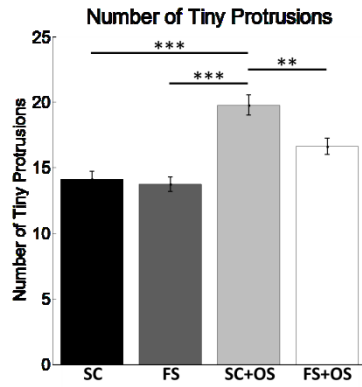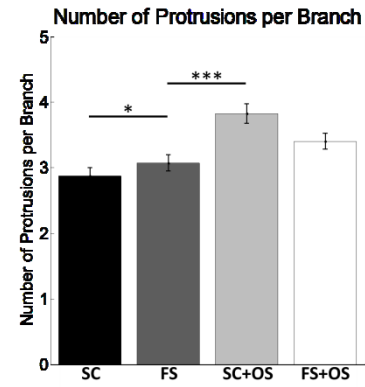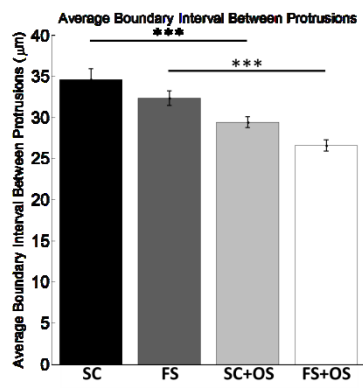



**b**

| Metric Category             | Metrics                                           | FS vs. SC | FS vs. FS+OS | FS vs. SC+OS | SC vs. FS+OS | SC vs SC+OS | FS+OS vs SC+OS |
|-----------------------------|---------------------------------------------------|-----------|--------------|--------------|--------------|-------------|----------------|
| Cell Size                   | 1. Area                                           | ***       | ns           | ***          | ***          | ns          | ***            |
|                             | 2. Perimeter                                      | ns        | ns           | ***          | ns           | ***         | ***            |
|                             | 3. Mean Boundary Distance                         | ns        | ns           | ***          | **           | ***         | ***            |
|                             | 4. Max Boundary Distance                          | ns        | ns           | ***          | ns           | ***         | ***            |
|                             | 5. Major Axis Length                              | ***       | **           | ***          | ***          | ***         | ns             |
|                             | 6. Minor Axis Length                              | ***       | ***          | *            | ***          | ***         | ***            |
|                             | 7. Max Major Branch Length                        | ns        | **           | ***          | *            | *           | ns             |
|                             | 8. Mean Major Branch Length                       | ***       | ***          | ns           | ***          | ***         | ***            |
|                             | 9. Max Major Branch Width                         | ns        | ns           | ***          | ns           | ***         | ***            |
|                             | 10. Mean Major Branch Width                       | ***       | ns           | ***          | ***          | ns          | ***            |
| Shape Pattern               | 11. Circularity                                   | ***       | ns           | ns           | *            | *           | ns             |
|                             | 12. Solidity                                      | ***       | ***          | ***          | **           | **          | ns             |
|                             | 13. Aspect Ratio                                  | ns        | **           | ***          | *            | ***         | **             |
|                             | 14. Num. of Major Branches                        | ns        | ns           | **           | ns           | ns          | ns             |
|                             | 15. Max Branch Length/<br>Major Axis Length       | ns        | ns           | ns           | ns           | ns          | ns             |
|                             | 16. Mean Branch Length/<br>Equivalent Radius      | ns        | ns           | ns           | ns           | ns          | ns             |
| Local Curvature Information | 17. Mean Negative Curvature                       | *         | ns           | ***          | ns           | ns          | **             |
|                             | 18. Invagination                                  | ***       | ns           | ***          | ***          | ns          | ***            |
|                             | 19. Tortuosity                                    | ns        | ns           | ***          | *            | ***         | ns             |
|                             | 20. Num. of Tiny Protrusions                      | ns        | ***          | ns           | ***          | ***         | ns             |
|                             | 21. Num. of Protrusions per Branch                | ns        | ns           | ns           | *            | ns          | ***            |
|                             | 22. Average Boundary Interval Between Protrusions | ***       | ns           | ***          | ***          | ns          | ***            |

**Supplementary Fig 2.** (a) Shape metrics quantifying cell shapes of hBMSCs in FS, SC, FS +OS and SC+OS. All error bars represent standard error of the mean. (b) Summary of the statistical analysis of each cell shape metrics with 1-way ANOVA and Tukey Multicomparison test (ns:  $p > 0.05$ , \*:  $p < 0.05$ , \*\*:  $p < 0.01$ , \*\*\*:  $p < 0.001$ ).

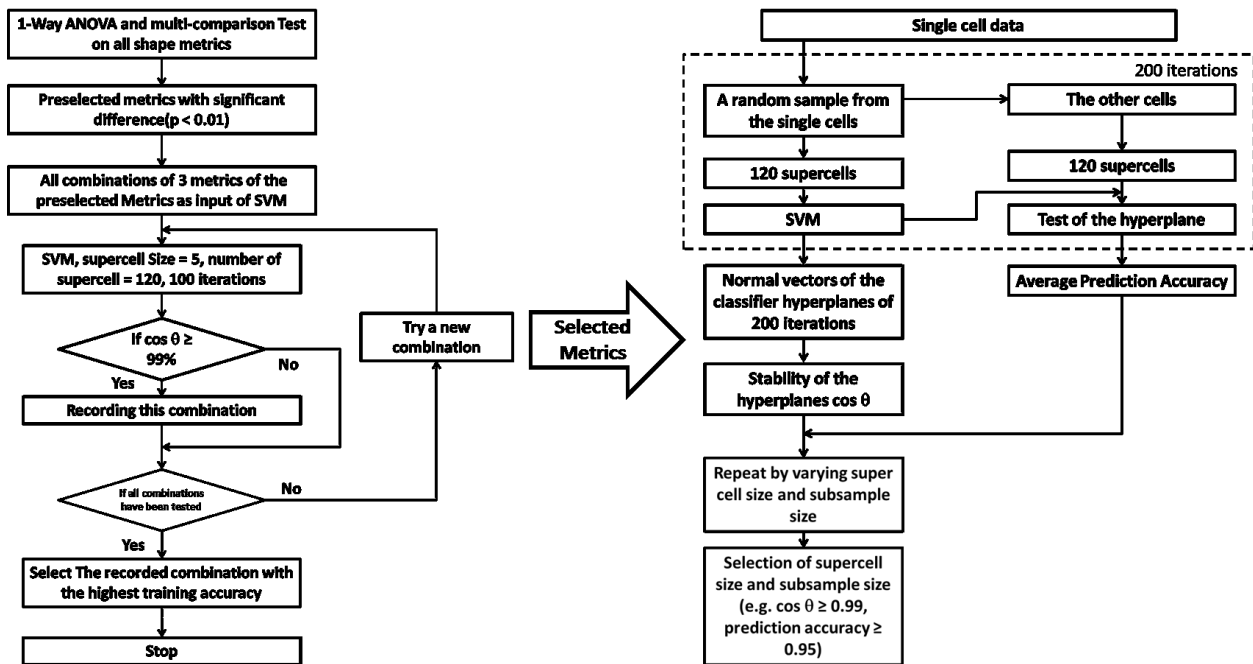

**Supplementary Fig 3.** Flow chart of the training and feature selection procedure followed by the flow chart of subsampling validation for the selected metrics.
